# Supplementary material for: Organ-specific expression of genes associated with the UDP-glucose metabolism in sugarcane (Saccharum spp. hybrids)
Source: Research Square preprint supplement (doi:10.21203/rs.3.rs-1452946/v1), 2022-04-21
Supplement: Supplementary file 1 [file 319e6b22622001e0c2612a05.docx]

**SUPPLEMENTARY INFORMATION**

**Organ-specific expression of genes associated with the
UDP-glucose metabolism in sugarcane (*Saccharum* spp. hybrids)**

Patrick J Mason, Nam V Hoang, Frederik C Botha, Agnelo Furtado,
Annelie Marquardt, Robert J Henry.

**Figures S1-S10, and Table S1**

- **Figure S1.** Schematic of sugarcane transcript gene family homologue assignment and quantification.
- **Table S1.** Numerical Identifier for Tukey *t*-test results and one-way ANOVA significance values.
- **Figure S2.** One-way ANOVA and Tukey *t*-test results from SuSy, SPS, SPP and CSLA gene family expression comparisons.
- **Figure S3.** One-way ANOVA and Tukey *t*-test results from CesA, CSLC, CSLD and CSLE gene family expression comparisons.
- **Figure S4.** One-way ANOVA and Tukey *t*-test results from CSLF, CSLG, CSLH and UGD gene family expression comparisons.
- **Figure S5.** One-way ANOVA and Tukey *t*-test results from UGE, UXE, RHM and GALE gene family expression comparisons.
- **Figure S6.** One-way ANOVA and Tukey *t*-test results from UXS and UAXS gene family expression comparisons.
- **Figure S7.** One-way ANOVA and Tukey *t*-test results from MIPS, GluK, MIP and MIOX gene family expression comparisons.
- **Figure S8.** One-way ANOVA and Tukey *t*-test results from Invertase gene families ANINV, CINV, CWI and VINV.
- **Figure S9.** One-way ANOVA and Tukey *t*-test results from UGPase, AGP, PGM and G6PI gene family expression comparisons.
- **Figure S10.** One-way ANOVA and Tukey *t*-test results from HXK and FK gene family expression comparisons.

**Figure S1.** Schematic of sugarcane transcript gene family homologue assignment and quantification.

**Table S1.** Numerical Identifier for Tukey *t*-test results and one-way ANOVA significance values.

| **Tissue/Organ Type** | **Numerical Identifier** |
| --- | --- |
| Bottom Internode | 1 |
| Middle Internode | 2 |
| Top Internode | 3 |
| Root | 4 |
| 1st Visible Dewlap Leaf | 5 |
| 5th Visible Dewlap Leaf | 6 |

**Figure S2.** One-way ANOVA and Tukey *t*-test results from SuSy, SPS, SPP and CSLA gene family expression comparisons.

**Figure S3.** One-way ANOVA and Tukey *t*-test results from CesA, CSLC, CSLD and CSLE gene family expression comparisons.

**Figure S4.** One-way ANOVA and Tukey *t*-test results from CSLF, CSLG, CSLH and UGD gene family expression comparisons.

**Figure S5.** One-way ANOVA and Tukey *t*-test results from UGE, UXE, RHM and GALE gene family expression comparisons.

**Figure S6.** One-way ANOVA and Tukey *t*-test results from UXS and UAXS gene family expression comparisons.

**Figure S7.** One-way ANOVA and Tukey *t*-test results from MIPS, GluK, MIP and MIOX gene family expression comparisons.

**Figure S8.** One-way ANOVA and Tukey *t*-test results from Invertase gene families ANINV, CINV, CWI and VINV.

**Figure S9.** One-way ANOVA and Tukey *t*-test results from UGPase, AGP, PGM and G6PI gene family expression comparisons.

**Figure S10.** One-way ANOVA and Tukey *t*-test results from HXK and FK gene family expression comparisons.
